# **Behavioral thermal tolerance predicts distribution pattern but not habitat use in sympatric Neotropical frogs**

Juan C. Diaz-Ricaurte<sup>1,2,\*¶</sup>, Filipe C. Serrano<sup>1¶</sup>, Estefany Caroline Guevara-Molina<sup>3</sup>,  
Cybele Araujo<sup>4</sup> and Marcio Martins<sup>1</sup>

<sup>1</sup> Programa de Pós-Graduação em Ecologia Aplicada, Escola Superior de Agricultura Luiz de Queiroz, Piracicaba, São Paulo, Brazil.

<sup>2</sup> Departamento de Ecologia, Instituto de Biociências, Universidade de São Paulo, São Paulo, São Paulo, Brasil.

<sup>3</sup> Departamento de Fisiologia, Instituto de Biociências, Universidade de São Paulo, São Paulo, São Paulo, Brasil.

<sup>4</sup> Instituto Florestal, Seção de Animais Silvestres, Horto Florestal, São Paulo, São Paulo, Brazil.

\* Corresponding author:

E-mail: [juan.diaz@usp.br](mailto:juan.diaz@usp.br)

¶Juan C. Diaz-Ricaurte and Filipe C. Serrano are Joint First Authors

## 23 Abstract

24 Environmental temperatures are a major constraint on ectotherm abundance and  
 25 diversity, influencing their distribution and natural history. Comparing thermal  
 26 tolerances with environmental temperatures is a simple way to estimate thermal  
 27 constraints on species distributions. We investigate the potential effects of thermal  
 28 tolerance on anuran local (habitat) and global distribution patterns and associated  
 29 behavioral responses. We tested for differences in Voluntary Thermal Maximum of two  
 30 sympatric frog species of the genus *Physalaemus* in the Cerrado ecoregion. For each  
 31 species, we constructed models to assess the effects of period of day, duration of  
 32 experiment, initial body mass, initial body temperature and heating rate on the  $VT_{Max}$ .  
 33 We mapped the difference between  $VT_{Max}$  and maximum daily temperature ( $VT_{Max} -$   
 34  $ET_{Max}$ ) for each occurrence point. *Physalaemus nattereri* had a significantly higher  
 35  $VT_{Max}$  than *P. cuvieri*. For *P. nattereri*, the model including only period of day was  
 36 chosen as the best to explain variation in the  $VT_{Max}$ . For *P. cuvieri*, no model was  
 37 selected as best to predict  $VT_{Max}$ . The  $VT_{Max} - ET_{Max}$  values were significantly different  
 38 between species, with *P. nattereri* mostly found in localities that attain maximum  
 39 temperatures lower than its  $VT_{Max}$  and *P. cuvieri* showing the reverse pattern. Regarding  
 40 habitat use, we found *P. cuvieri* to be slightly more abundant in open habitats than in  
 41 non-open habitats, whereas *P. nattereri* shows the reverse pattern. The difference in  
 42  $VT_{Max}$  values between these two species might be related to their different body sizes,  
 43 but additionally might reflect their natural history, especially the way they use their  
 44 habitats, and phylogenetic constraints (the species studied are in different clades within  
 45 *Physalaemus*). Our study indicates that differences in behavioral thermal tolerance may  
 46 be important in shaping local and regional distribution patterns. Furthermore, small-

scale habitat use might reveal a link between behavioral thermal tolerance and natural history strategies.

## Introduction

Environmental temperatures are a major constraint on ectotherm abundance and diversity, influencing their distribution and natural history [1, 2, 3]. Several studies have explored environmental constraints on ectothermic vertebrates at regional and global scale [4, 5, 6]. The physiological performance of individuals can be negatively affected by high environmental temperatures [7], which can lead to declining populations and/or local extinctions [3]. Thus, knowing species thermal tolerance and exploring how environmental temperatures might affect their physiology and restrict their distribution is of primary concern for long-term conservation, especially under a global warming trend (e.g. [8]).

Many studies infer potential distribution of species using solely environmental temperatures from occurrence localities to model their potential niche (e.g. [9–10]). However, incorporating thermal tolerances to these analyses allows a more realistic approach to estimate thermal constraints on distributions [11]. Behavioral and physiological thermal tolerances impact not only species ranges, but also the distribution and abundance patterns of their populations [3]. Identifying thermal tolerance thresholds outside the range of preferential body temperatures for thermoregulation (see [12]) allows for the identification of temperatures that directly affect the behavioral and physiological thermal tolerance of ectothermic organisms. One of the thresholds related to PBT is the Voluntary Thermal Maximum ( $VT_{Max}$ ), which represents a behavioral thermal tolerance, i.e., the maximum temperature that an

organism will endure before trying to move to a place with a lower temperature, thus trying to maintain its body temperature within its range of preferential body temperatures [3, 12, 13]. However, if an individual fails to respond to its  $VT_{Max}$ , an increase in body temperature will expose it to its physiological thermal limit (i. e., its Critical Thermal Maximum), which can lead to functional collapse and consequently death due to overheating [13, 14].

Behavioral thermal tolerances can be influenced by factors such as reproductive status, sex, photoperiod, and hydration state [12, 15]. Additionally, thermal tolerances such as the  $VT_{Max}$  might decrease with body size: due to thermal inertia, larger animals might have slower heating and cooling rates than small animals, which increases the exposed time to stressful thermal conditions [16–17]. Yet, most studies focus only on upper and critical temperatures (e.g. [18–19] and thus fail to incorporate behavioral response, which derives from the animal's own perception of thermal stress. Additionally, the behavioral response to upper voluntary limits might represent a more informative ecological threshold to identify thermal constraints on geographic distribution [3, 8, 13, 20–25]. Contrary to the Critical Thermal Maximum, the exposure to the  $VT_{Max}$  does not induce an immediate loss of locomotion. Thus,  $VT_{Max}$  can more realistically portrait changes in species behavior associated with their natural history.

The genus *Physalaemus* Fitzinger 1826 is one of the largest groups of frogs in the Neotropics, with 48 recognized species [26]. This group is distributed from the lowlands of southern Venezuela and the Llanos of southeastern Colombia to central Argentina [26]. Some species of this genus have sympatric populations along extensive areas, such as *Physalaemus nattereri* [27] and *Physalaemus cuvieri* [28] (see [26]), which are widespread in central South America [29]. These species belong to different clades within *Physalaemus* (*P. signifer* and *P. cuvieri* clades, respectively; [30].

*Physalaemus nattereri* has a stout body, a moderate to large size (adult snout-to-vent length of 29.8–50.6 mm) and is endemic to the Cerrado, whereas *P. cuvieri* has a slenderer body, a small size (snout-to-vent length of adults 28–30 mm) and occurs throughout the Cerrado, in southern portions of the Amazon Forest and in the Atlantic Forest [31]; but see Methods). Even though both species occur in Cerrado, it is still unclear how their local abundances vary within Cerrado vegetation types, from the ‘cerradão’, which has a forest structure, to grasslands (‘campo sujo’). Additionally, *P. cuvieri* and *P. nattereri* differ in their biology. While *P. cuvieri* uses several aquatic habitats for reproduction and seeks shelter during the day in already-dug burrows, *P. nattereri* breeds mostly in temporary puddles and buries itself in the soil during the day aided by metatarsal tubercles (S1 Fig) on its hind feet [32–34].

Herein we investigate the potential effects of temperature on anuran local (habitat) and global distribution patterns and associated behavioral responses. We test for differences in the  $VT_{Max}$  between *P. nattereri* and *P. cuvieri* and explore possible effects of their behavioral thermal tolerances on their geographic distribution and habitat use in the Cerrado. We hypothesize that: i) the  $VT_{Max}$  is lower for *P. nattereri* due to its larger body size and consequent slower cooling rates; ii) the species with the lower  $VT_{Max}$  is less abundant in habitats with higher environmental temperatures, such as open areas of the Cerrado; and iii) there is a relationship between  $VT_{Max}$  and geographic distribution, such that species occur mostly in localities where the maximum environmental temperature is below their  $VT_{Max}$ . We expect that our results can contribute to studies on the effect of global climate change on habitat use and geographic distribution.

## Materials and Methods

## Physiological Parameters

### Capture and maintenance of individuals

Fieldwork was carried out at Estação Ecológica de Santa Bárbara (22°49'2.43"S, 49°14'11.29"W; WGS84, 590 m elevation), one of the few remnants of Cerrado savannas in the state of São Paulo, Brazil, with a total area of 2,712 ha [35]. The climate is Humid subtropical [36], with temperatures averaging 24°C and 16°C during January and July, the hottest and coldest months, respectively. The average annual rainfall is 1100–1300 mm, with marked dry and wet seasons (approximately April to September and October to March, respectively; [37]). The landscape consists mainly of open grassland and savanna-type formations, such as ‘campo sujo’ and ‘campo cerrado’, but also of non-open vegetation types such as ‘cerrado *strictu sensu*’ (dense savanna) and ‘cerradão’ (cerrado woodland). Between 24 and 28 September 2018, we captured 14 individuals of *P. nattereri* and 20 of *P. cuvieri* in pitfall traps with drift fences [38–39] and these individuals were housed individually in plastic boxes at room temperature.

### Measurements of the Voluntary Thermal Maximum (VT<sub>Max</sub>)

To obtain the VT<sub>Max</sub> for each species, we measured each individual within one day of collection at 100% hydration level. To reach maximum hydration level, each individual was placed in a cup with water *ad libitum* one hour prior to the experiment. Then its pelvic waist was pressed to expel the urine and to obtain its 100% hydration level in relation to its standard body mass. We heated each individual in a metal box wrapped in a thermal resistance for heating. The box had a movable lid, allowing the animal to easily leave the box when needed. A thin thermocouple (type-T, Omega®) was located in the inguinal region of each individual to record its body temperature

during the heating experiment [15]. Another type-T thermocouple was placed on the surface of the box to record heating rate and to make sure that the temperature did not exceeded 5–6°C the temperature of the individual. The thermocouples were calibrated and connected to a FieldLogger PicoLog TC-08 to record temperature data every 10 seconds. The  $VT_{Max}$  of each individual was recorded as its last body temperature at the time of leaving the box. Once its final body mass was measured, it was taken to a container with water for recovery. Furthermore, to control for a potential circadian effect on tolerances, we tested if the  $VT_{Max}$  differed between different times of the day by testing half of the individuals of each species in different periods: 10h00 to 17h00 (daytime) and 19h00 to 24h00 (nighttime).

### *Statistical analyses*

We used t-tests to compare the  $VT_{Max}$ , period (day or night), duration of experiment, initial body mass, initial body temperature and heating rate between species. For each species, we constructed generalized least squares models to assess the effects of the previous variables on the  $VT_{Max}$ . We used the Akaike Information Criterion (AIC) to select the model that best represented the effects of factors and their interaction on the  $VT_{Max}$  of each species. Differences of two units in AIC were not considered to be different [40]. We considered the model with AIC weight values close or equal to 1 to represent the strongest model. All statistical analyses and plotting were performed in R 3.5.0 [41], with the nlme [42], ggplot2 [43] and AICcmodavg [44] packages.

### *Distribution and habitat*

We used vouchered occurrence data for *P. cuvieri* (N = 163) and *P. nattereri* (N = 164) in the Cerrado from a distribution database built for another study [45]. Although the populations traditionally assigned to *P. cuvieri* (see [26]) may include more than one cryptic species (see [30]), most of the distribution of *P. cuvieri* in the Cerrado correspond to a single lineage (Lineage 2 in [30]). We calculated and mapped  $VT_{Max} - ET_{Max}$  as the difference between the  $VT_{Max}$  and maximum environmental temperature (Bio 5; 30 seconds resolution from WorldClim Vr. 2.0; [46]) for each occurrence point in Cerrado and the  $VT_{Max}$  obtained at Estação Ecológica de Santa Bárbara for *P. cuvieri* and *P. nattereri*. We used a t-test to compare  $VT_{Max} - ET_{Max}$  of species occurrence points. All maps and GIS procedures were made in QGIS 3.12 [47]. We tested for differences between species in habitat use by comparing abundances in open ('campo cerrado', 'campo sujo' and 'campo limpo') and non-open habitats (gallery forest, 'cerradão' and cerrado *stricto sensu*; [48] for communities within Cerrado where both species occur in sympatry [49–50].

## Results

### *Voluntary Thermal Maximum ( $VT_{Max}$ ) and experimental conditions*

We found that the mean  $VT_{Max}$  was significantly lower in *P. cuvieri* than in *P. nattereri* (Table 1;  $t = 3.99$ ,  $df = 32$ ,  $p = 0.0003$ ). We also found significant differences in initial body mass (Table 1;  $t = 4.26$ ,  $df = 32$ ,  $p = 0.0001$ ) between species. We did not find significant differences in start body temperatures (Table 1;  $t = 1.39$ ,  $df = 32$ ,  $p = 0.1735$ ), period of day (Table 1;  $t = 0.12$ ,  $df = 32$ ,  $p = 0.9051$ ), duration of the experiment (Table 1;  $t = 0.44$ ,  $df = 32$ ,  $p = 0.6585$ ) and heating rate (Table 1;  $t = 1.51$ ,  $df = 32$ ,  $p = 0.1395$ ) between species (see S1, S2 and S3 Tables).



**Table 1.** Variation of the  $VT_{Max}$  and experimental variables for *P. cuvieri* and *P. nattereri* from Estação Ecológica de Santa Bárbara, state of São Paulo, Brazil. Experimental variables are: period of day (day and night), initial body temperature (ST), duration of experiment (DOE), initial body mass (IBM), and heating rate (HRA).

| Variable     | <i>Physalaemus cuvieri</i> |                    | <i>Physalaemus nattereri</i> |                    |
|--------------|----------------------------|--------------------|------------------------------|--------------------|
|              | ±SD                        | Range              | ±SD                          | Range              |
| <b>VTMax</b> | 30.20 ± 1.69 °C            | 27.48 - 33.13 °C   | 32.74 ± 2.14 °C              | 29.59 - 36.71 °C   |
| <b>Day</b>   | 29.62 ± 1.48 °C            | 27.48 - 31.94 °C   | 34.18 ± 1.62 °C              | 32.09 - 36.71 °C   |
| <b>Night</b> | 30.69 ± 1.76 °C            | 28.14 - 33.13 °C   | 31.74 ± 1.96 °C              | 29.59 - 34.97 °C   |
| <b>DOE</b>   | 27.85 ± 18.17 min          | 6 - 86 min         | 26.72 ± 20.07 min            | 6 - 81 min         |
| <b>ST</b>    | 25.79 ± 1.18 °C            | 22.95 - 27.0 °C    | 26.41 ± 2.30 °C              | 22.73 - 30.58 °C   |
| <b>IBM</b>   | 2.15 ± 0.72 g              | 1.19 ± 3.82 g      | 7.27 ± 7.52 g                | 4.86 - 32.45 g     |
| <b>HRA</b>   | 0.07 ± 0.07 °C/min         | 0.01 - 0.38 °C/min | 0.12 ± 0.21 °C/min           | 0.06 - 0.84 °C/min |

We tested six models for both species using the AIC selection criteria. For *P. nattereri*, the model including only period (day or night) was chosen as a better explanation of variation in the  $VT_{Max}$  (Table 2), with higher values attained during daytime. For *P. cuvieri*, the model considering only the period of experiment had the highest AIC weight. However, the difference of its AIC value in relation to the null model was less than two units and thus we retained the simpler null model, which indicates that no variable explains the variation of the  $VT_{Max}$  of this species (Table 3).

**Table 2.** Effect of period, start body temperature, duration, initial body mass, and heating rate on the Voluntary Thermal Maximum ( $VT_{Max}$ ) of *P. nattereri* from Estação Ecológica de Santa Bárbara, state of São Paulo, Brazil.

| Mode<br>I | Variables              | Value  | Std.Error | t-value | p-value | AIC-<br>value | AIC-<br>weight |
|-----------|------------------------|--------|-----------|---------|---------|---------------|----------------|
| VI        | Intercept              | 34.245 | 0.746     | 45.89   | 0       | 60.46         | 0.68           |
|           | Period                 | -2.393 | 0.987     | -2.424  | 0.032   |               |                |
| I         | Intercept              | 32.877 | 0.572     | 57.384  | <0.0001 | 64.043        | 0.22           |
| V         | Intercept              | 33.115 | 6.588     | 5.026   | 0.0004  | 62.422        | 0.09           |
|           | Period                 | -2.340 | 1.075     | -2.176  | 0.0522  |               |                |
|           | Start body temperature | 0.041  | 0.239     | 0.172   | 0.8661  |               |                |
| IV        | Intercept              | 32.907 | 7.067     | 4.655   | 0.0009  | 64.396        | 0.01           |
|           | Period                 | -2.382 | 1.167     | -2.040  | 0.0686  |               |                |
|           | Start body temperature | 0.043  | 0.251     | 0.174   | 0.8652  |               |                |
|           | Duration               | 0.003  | 0.028     | 0.137   | 0.8937  |               |                |
| II        | Intercept              | 40.452 | 8.555     | 4.728   | 0.0015  | 64.076        | 0              |
|           | Period                 | -4.717 | 1.818     | -2.594  | 0.0319  |               |                |
|           | Start body temperature | -0.261 | 0.308     | -0.845  | 0.4225  |               |                |
|           | Duration               | 0.047  | 0.038     | 1.234   | 0.2519  |               |                |
|           | Initial body mass      | 0.133  | 0.088     | 1.511   | 0.1691  |               |                |
|           | Heating rate           | -5.611 | 4.139     | -1.355  | 0.2122  |               |                |
| III       | Intercept              | 33.394 | 7.097     | 4.704   | 0.0011  | 64.971        | 0              |
|           | Period                 | -2.897 | 1.281     | -2.260  | 0.0501  |               |                |
|           | Start body temperature | -0.007 | 0.257     | -0.030  | 0.9762  |               |                |
|           | Duration               | 0.013  | 0.03      | 0.443   | 0.6679  |               |                |
|           | Initial body mass      | 0.081  | 0.083     | 0.981   | 0.3518  |               |                |

211

212 **Table 3.** Effect of period, start body temperature, duration, initial body mass, and  
213 heating rate on the Voluntary Thermal Maximum (VT<sub>Max</sub>) of *P. cuvieri* from Estação  
214 Ecológica de Santa Bárbara, state of São Paulo, Brazil.

| Mode<br>I | Variables              | Value  | Std.Error | t-value | p-value | AIC-value | AIC weight |
|-----------|------------------------|--------|-----------|---------|---------|-----------|------------|
| I         | Intercept              | 30.263 | 0.373     | 81.123  | <0.0001 | 80.204    | 0.44       |
| VI        | Intercept              | 29.623 | 0.533     | 55.479  | 0       | 79.497    | 0.42       |
|           | Period                 | 1.163  | 0.719     | 1.615   | 0.1236  |           |            |
| V         | Intercept              | 28.823 | 8.404     | 3.429   | 0.0032  | 81.486    | 0.09       |
|           | Period                 | 1.144  | 0.766     | 1.493   | 0.1536  |           |            |
|           | Start body temperature | 0.031  | 0.329     | 0.095   | 0.9251  |           |            |
| IV        | Intercept              | 24.78  | 8.621     | 2.874   | 0.011   | 81.05     | 0.05       |
|           | Period                 | 1.516  | 0.786     | 1.927   | 0.0719  |           |            |
|           | Start body temperature | 0.131  | 0.327     | 0.402   | 0.6925  |           |            |
|           | Duration               | 0.032  | 0.022     | 1.439   | 0.1693  |           |            |
| III       | Intercept              | 24.608 | 8.938     | 2.753   | 0.0148  | 83.001    | 0.01       |
|           | Period                 | 1.574  | 0.866     | 1.817   | 0.0892  |           |            |

|           |                               |        |       |        |        |        |   |
|-----------|-------------------------------|--------|-------|--------|--------|--------|---|
|           | <b>Start body temperature</b> | 0.144  | 0.343 | 0.419  | 0.6807 |        |   |
|           | <b>Duration</b>               | 0.034  | 0.026 | 1.323  | 0.2054 |        |   |
|           | <b>Initial body mass</b>      | -0.115 | 0.601 | -0.191 | 0.8505 |        |   |
| <b>II</b> | <b>Intercept</b>              | 25.217 | 9.371 | 2.69   | 0.0176 | 84.824 | 0 |
|           | <b>Period</b>                 | 1.56   | 0.893 | 1.746  | 0.1027 |        |   |
|           | <b>Start body temperature</b> | 0.128  | 0.357 | 0.358  | 0.7255 |        |   |
|           | <b>Duration</b>               | 0.034  | 0.026 | 1.285  | 0.2194 |        |   |
|           | <b>Initial body mass</b>      | -0.082 | 0.626 | -0.131 | 0.8973 |        |   |
|           | <b>Heating rate</b>           | -1.906 | 5.408 | -0.352 | 0.7297 |        |   |

215

## 216 *Distribution and habitat*

217 Overall distribution of occurrences was similar for the two species, occupying  
218 mainly the central and southern portions of the Cerrado (Fig 1; S4 Table). Thus, the  
219 distribution of environmental temperatures was similar for both species. However,  
220 because the  $VT_{Max}$  was different between species, the resulting distribution of  $VT_{Max}$  -  
221  $ET_{Max}$  values were significantly different (Fig 1A–B). The north central portion of the  
222 Cerrado showed much higher environmental temperatures than the  $VT_{Max}$  of *P. cuvieri*  
223 (Fig 1A), while this region is mostly below the  $VT_{Max}$  of *P. nattereri* (Fig 1B).  
224 Furthermore,  $VT_{Max}$  -  $ET_{Max}$  values were found to be significantly different between  
225 species ( $t = 13.26$ ,  $df = 214.98$ ,  $p < 0.001$ ; Fig 1C). *Physalaemus nattereri* is mostly  
226 found (~ 80%) on localities that attain maximum temperatures equal to or lower than its  
227  $VT_{Max}$ , whereas *P. cuvieri* seems to be mostly distributed (~ 60%) in localities with  
228 higher  $VT_{Max}$  -  $ET_{Max}$  values (Fig 1C).

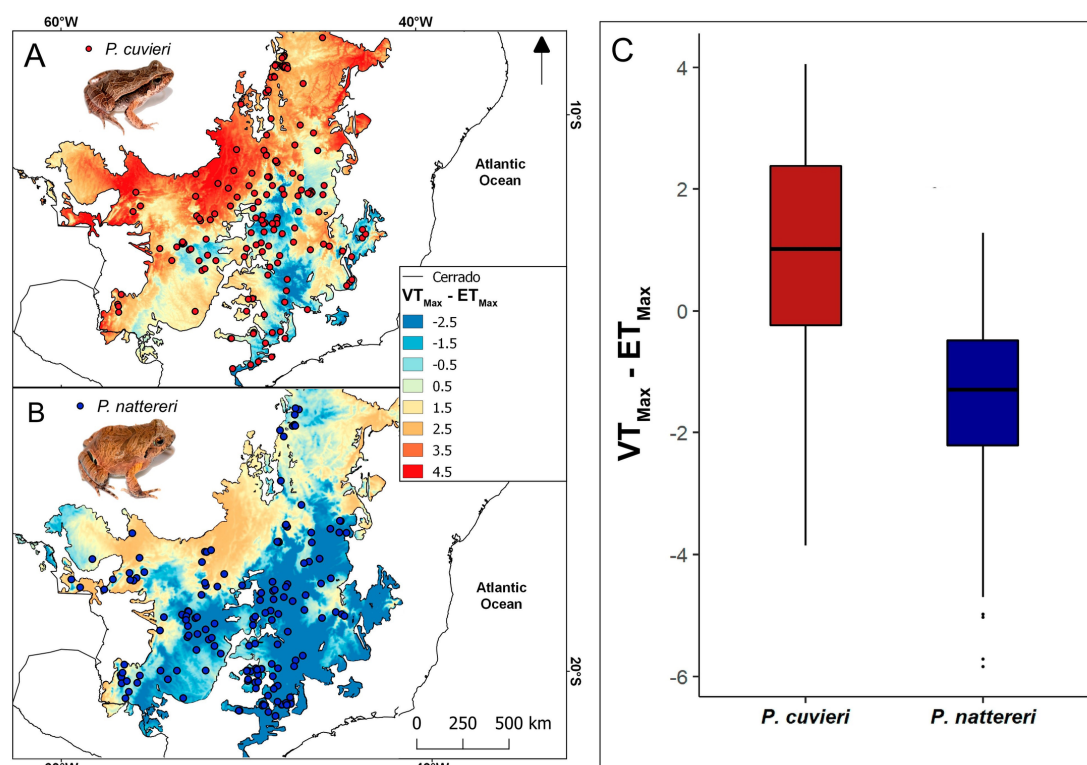

**Fig 1. Geographical distribution of two species of frogs and  $VT_{Max} - ET_{Max}$  values throughout their distribution.**

(A) Distribution of *Physalaemus cuvieri*; (B) Distribution of *Physalaemus nattereri*; and (C) Boxplot of  $VT_{Max} - ET_{Max}$  values at occurrence points for both species in the Cerrado.

We obtained abundance data for six localities in southern Cerrado, most of them from protected areas (Fig 2). *Physalaemus cuvieri* was more abundant in open areas than in non-open areas (mean = 58.1%; sd = 35.5%), while *P. nattereri* was less abundant in open areas than in non-open areas (mean = 42.3%; sd = 29.5%; S5 Table).

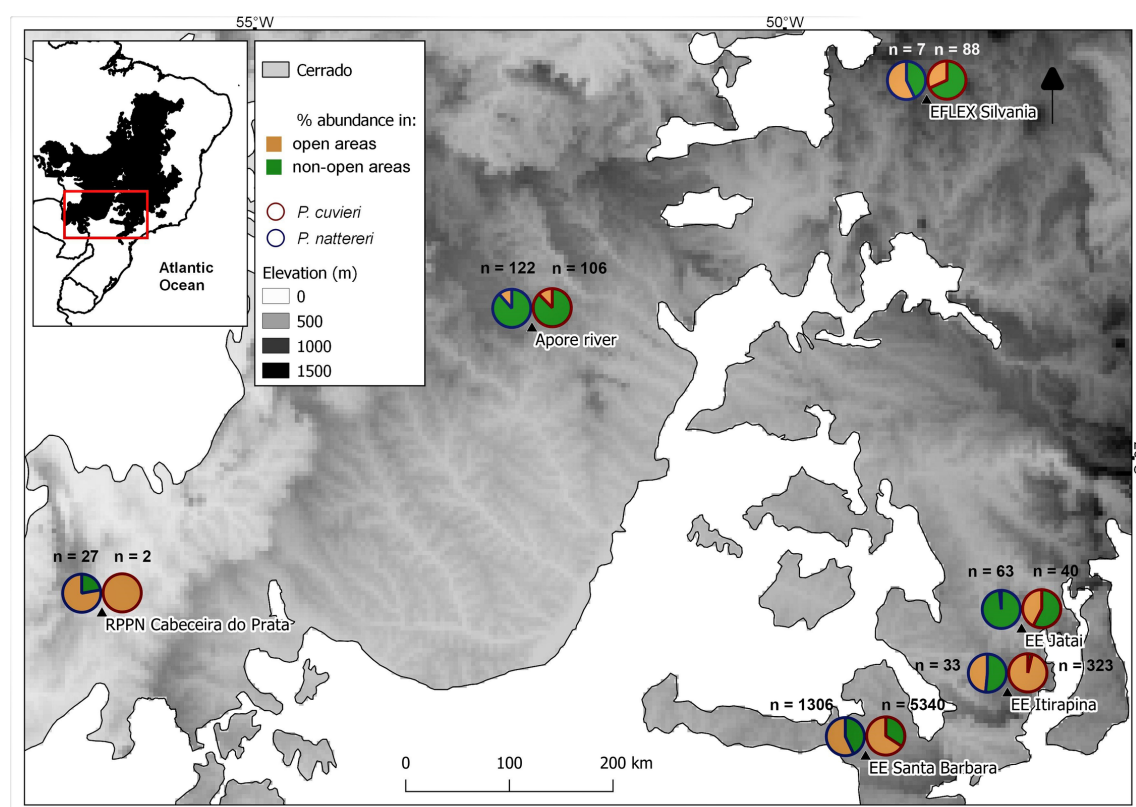

**Fig 2. Relative abundance of *P. cuvieri* and *P. nattereri* in open and non-open areas in Cerrado.**

Relative abundance (in %) of *P. cuvieri* (blue circles) and *P. nattereri* (red circles) in open (brown) and non-open areas (green) in Cerrado in six localities (see Table S5): Estação Florestal de Experimentação (EFLEX) de Silvânia (GO), Reserva Particular do Patrimônio Natural (RPPN) Cabeceira do Prata (MS), Estação Ecológica (EE) Jataí (SP), Estação Ecológica de Itirapina (SP), Estação Ecológica de Santa Bárbara (SP), and Apore river (GO and MS). Sources of data: [49, 51–54].

## Discussion

Our results show that the Voluntary Thermal Maximum ( $VT_{Max}$ ) is higher for *P. nattereri* than for *P. cuvieri*, contrary to our first prediction that larger body size (and an expected slower cooling rate) would reflect in a lower  $VT_{Max}$ . Additionally, no

difference in heating rate was found between species and only *P. nattereri* showed a significant difference in its  $VT_{Max}$  between day and night. Regarding habitat use, we found *P. cuvieri* to be slightly more abundant in open habitats than in non-open habitats, whereas *P. nattereri* shows the reverse pattern, which does not support our second prediction that the species with the lower thermal tolerance would not occur predominantly in open areas. Lastly, in spite of both species being widespread in Cerrado, they showed different patterns of  $VT_{Max}$  -  $ET_{Max}$  values throughout their ranges, with only *P. nattereri* having most of its records in localities with temperatures below its  $VT_{Max}$ . Thus, only for *P. nattereri* did we confirm our prediction that global distribution is mostly comprised of localities with environmental temperatures below the  $VT_{Max}$ .

The difference in  $VT_{Max}$  values between these two frog species might be related to their different body sizes [55–56] but additionally might reflect their natural history. Although there was no difference in heating rate between the species, *P. nattereri* might still cool slower when exposed to high temperatures. Since it burrows in the soil [33–34], this may allow it to quickly reduce its body temperature, since the soil is a good thermal insulant [57]. On the other hand, *P. cuvieri* uses preexisting cavities as diurnal refuges (e.g. see [58–59]), which, in spite of being below ground level, can heat up faster than the soil (S2 Fig). Yet, despite having a lower  $VT_{Max}$ , most of the localities of *P. cuvieri* in Cerrado have temperatures above its  $VT_{Max}$ . This suggests that other aspects of its thermal ecology might be playing a role in avoiding thermal stress, such as a reduced daily activity time or physiological traits regulating hydration state.

As wet skin ectotherms, hydration level can also influence the temperatures tolerated and selected by individuals for thermoregulation in their habitats [60–63]. This has been observed for other frog species (e. g. *Lithobates catesbeianus*; [15]), with

individuals decreasing their  $VT_{Max}$  in response to dehydration, and some even losing their behavioral response to  $VT_{Max}$ . Even though we controlled for hydration when measuring  $VT_{Max}$ , individuals in the wild rarely are at their optimal hydration level and thus desiccation might influence local frog distribution [64]. Desiccation has been shown to be correlated with substrate use [65] and with dispersal probability throughout the landscape [64]. Additionally, closely-related frog species may vary in their response to desiccation along thermal gradients, with some species showing greater resistance to water loss at lower temperatures, and others at higher temperatures [66]. Therefore, knowing the interaction between  $VT_{Max}$  and hydration state of individuals in their environments can help to understand patterns and/or limits in their distribution [64, 67–69].

We found that *P. nattereri* was most abundant in non-open habitats, despite our second hypothesis. This may be related to the fluctuating daily temperatures of Cerrado savannas. While open areas reach higher temperatures (up to 35–37 °C in open habitats versus 32–35 °C in non-open habitats, *pers. obs.*) due to the exposed soil and low to no tree cover, they also cool rapidly in the evening. Non-open areas, on the other hand, do not get as hot but stay warmer for longer, which may expose individuals to a longer period with temperatures close to their thermal limits (e.g. [14]). This may favor the occurrence of *P. nattereri* in non-open habitats, since it can withstand higher temperatures before seeking refuge. Again, this may be related to evaporative water loss since desiccation is more intense in open habitats [70–71]. Even though we found a relatively high variation in the data on habitat use for both species, the difference in the use of open and non-open habitats between species seem to reflect the overall patterns of their distribution throughout the Cerrado. We highlight the importance of considering different spatial scales — geographic range and habitat use, as proposed by [72] because

these allow to quantify how species distribution may reflect different aspects of their niches.

Despite numerous ecophysiological studies comparing how environmental temperatures influence habitat use of species [20, 73], these rarely account for thermal tolerances. Using behavioral thermal tolerances, such as the  $VT_{Max}$ , allows for the integration of thermoregulatory behavior, which usually happens before critical limits are reached [3, 74–75]. Furthermore, combining the  $VT_{Max}$  with natural history and geographic distribution data can be critical to understand how future scenarios of global warming might impact distribution [76–77], especially for amphibians which are already under a global decline worldwide [78–79]. Our study indicates that differences in behavioral thermal tolerance may be important in shaping local and regional distribution patterns. Furthermore, small-scale habitat use might reveal a link between behavioral thermal tolerance and natural history strategies. Further studies using additional sympatric species of the genus *Physalaemus* (e. g. *P. centralis*, from the same clade of *P. cuvieri*, and *P. marmoratus*, from the same clade of *P. nattereri*) could help to elucidate if those differences are due to body size variation or if tolerances are phylogenetically conserved. We hope this study stimulates future mechanistic studies on amphibian thermal ecology and on the impact of global warming on species distribution.

## Acknowledgements

We thank Instituto Florestal for allowing our work at Estação Ecológica de Santa Bárbara (permit #260108-008.476/2014; ICMBio-SISBIO for the permit to collect frog specimens (permit #50658-3); and Fundação de Amparo à Pesquisa do Estado de São



330 Paulo for a grant (#2018/14091-8). This study was financed in part by the Coordenação  
 331 de Aperfeiçoamento de Pessoal de Nível Superior – Brasil (CAPES) – Finance Code  
 332 001”. MM thanks Conselho Nacional de Desenvolvimento Científico e Tecnológico for  
 333 a research fellowship (# 306961/2015-6).

334

## References

1. Malcolm JR, Liu C, Neilson RP, Hansen L, Hannah LEE. Global warming and extinctions of endemic species from biodiversity hotspots. *Conserv Biol.* 2006; 20: 538–548.
2. Post E, Pedersen C, Wilmer CC, Forchhammer MC. Warming, plant phenology and the spatial dimension of trophic mismatch for large herbivores. *P Roy Soc B-Biol Sci.* 2008; 275: 2005–2013.
3. Camacho A, Rusch T, Ray G, Telemeco RS, Rodrigues MT, Angilletta MJ. Measuring behavioral thermal tolerance to address hot topics in ecology, evolution, and conservation. *J Therm Biol.* 2018; 73: 71–79.
4. Buckley LB, Rodda GH, Jetz W. Thermal and energetic constraints on ectotherm abundance: a global test using lizards. *Ecology.* 2008; 89: 48–55.
5. Currie DJ, Fritz JT. Global patterns of animal abundance and species energy use. *Oikos.* 1993; 56–68.
6. Allen AP, Brown JH, Gillooly JF. Global biodiversity, biochemical kinetics, and the energetic-equivalence rule. *Science.* 2002; 297: 1545–1548.
7. Pörtner HO, Farrell AP. Physiology and climate change. *Science.* 2008; 322: 690–692.
8. Sinervo B, Mendez-De-La-Cruz F, Miles DB, Heulin B, Bastiaans E, Villagrán-Santa Cruz M, et al. Erosion of lizard diversity by climate change and altered thermal niches. *Science.* 2010; 328:894–899.
9. Araujo MB, Guisan A. Five (or so) challenges for species distribution modelling. *J Biogeogr.* 2006; 33: 1677–1688.

- 358 10. Phillips SJ, Anderson RP, Schapire RE. Maximum entropy modeling of species  
359 geographic distributions. *Ecol Model.* 2006; 190: 231–259.
- 360 11. Camacho A, Rodrigues MT, Navas C. Extreme operative temperatures are better  
361 descriptors of the thermal environment than mean temperatures. *J Therm Biol.* 2015;  
362 49: 106–111.
- 363 12. Camacho A, Rusch TW. Methods and pitfalls of measuring thermal preference and  
364 tolerance in lizards. *J Therm Biol.* 2017; 68: 63–72.
- 365 13. Cowles RB, Bogert CM. A preliminary study of the thermal requirements of desert  
366 reptiles. *Bull Am Mus Nat Hist.* 1944; 83: 261–296.
- 367 14. Rezende EL, Castañeda LE, Santos M. Tolerance landscapes in thermal ecology.  
368 *Funct Ecol.* 2014; 28: 799–809.
- 369 15. Guevara-Molina EC, Gomes FR, Camacho Guerrero A. Effects of dehydration on  
370 thermoregulatory behavior and thermal tolerance limits of *Rana catesbeiana* (Anura:  
371 Ranidae). *J Therm Biol.*
- 372 16. Porter WP, Gates DM. Thermodynamic equilibria of animals with environment.  
373 *Ecol Monogr.* 1969; 39: 227–244.
- 374 17. Lunghi E, Manenti R, Canciani G, Scari G, Pennati R, Ficetola GF. Thermal  
375 equilibrium and temperature differences among body regions in European plethodontid  
376 salamanders. *J Therm Biol.* 2016; 60: 79–85.
- 377 18. Lutterschmidt WI, Hutchison VH. The critical thermal maximum: history and  
378 critique. *Can J Zool.* 1997a. 75: 1561–1574.
- 379 19. Lutterschmidt WI, Hutchison VH. The critical thermal maximum: data to support  
380 the onset of spasms as the definitive end point. *Can J Zool.* 1997b 75: 1553–1560.

20. Hillman PE. Habitat specificity in three sympatric species of Ameiva (Reptilia: Teiidae). Ecology. 1969; 50: 476–481.
21. Curry-Lindahl K. Thermal ecology of the tree agama (*Agama atricollis*) in Zaire with a review of heat tolerance in reptiles. J Zool. 1979; 188: 185–220.
22. Sunday JM, Bates AE, Kearney MR, Colwell RK, Dulvy NK, Longino JT, et al. Thermal-safety margins and the necessity of thermoregulatory behavior across latitude and elevation. PNAS. 2014; 111: 5610–5615.
23. Piantoni C, Navas CA, Ibargüengoytia NR. Vulnerability to climate warming of four genera of New World iguanians based on their thermal ecology. Anim Conserv. 2016; 19: 391–400.
24. Porter WP, Mitchell JW, Beckman WA, DeWitt CB. Behavioral implications of mechanistic ecology. Oecologia. 1973; 13: 1–54.
25. Kearney M, Predavec M. Do nocturnal ectotherms thermoregulate? A study of the temperate gecko *Christinus marmoratus*. Ecology. 2000; 81: 2984–2996.
26. Frost DR. Amphibian Species of the World [cited 14 March 2020]. Available from: <http://research.amnh.org/herpetology/amphibia/index.html>.
27. Steindachner F. Über einige neue Batrachier aus den Sammlungen des Wiener Museums. Sitzungsberichte der Kaiserlichen Akademie der Wissenschaften, Mathematisch-Naturwissenschaftliche Classe. 1863; 48:186–192.
28. Fitzinger LJFJ. Neue Classification der Reptilien nach ihren Natürlichen Verwandtschaften nebst einer Verwandtschafts-Tafel und einem Verzeichnisse der Reptilien-Sammlung des K. K. Zoologisch Museum's zu Wien. Wien: J. G. Heubner. 1826. pp. 66.

29. Aquino L, Reichle S, Silvano D, Langone J. *Physalaemus albonotatus* [cited 14 March 2020]. In: the IUCN Red List of Threatened Species 2004. Available from <http://dx.doi.org/10.2305/IUCN.UK.2004.RLTS.T57239A11607238.en>.
30. Lourenço LB, Cíntia PT, Baldo D, Nascimento J, Garcia PCA, Andrade GV, et al. Phylogeny of frogs from the genus *Physalaemus* (Anura, Leptodactylidae) inferred from mitochondrial and nuclear gene sequences. *Mol Phylogenet Evol.* 2015; 92: 204–216.
31. Nascimento LB, Caramaschi U, Cruz CAG. Taxonomic review of the species groups of the genus *Physalaemus* Fitzinger, 1826 with revalidation of the genera *Engystomops* Jiménez-de-la-Espada, 1872 and *Eupemphix* Steindachner, 1863 (Amphibia, Anura, Leptodactylidae). *Arch Mus Nac.* 2005; 63: 297–320.
32. Brasileiro CA, Sawaya RJ, Kiefer MC, Martins M. Amphibians of an open Cerrado fragment in southeastern Brazil. *Biota Neotrop.* 2005; 5: 93–109.
33. Giaretta AA, Facure KG. Terrestrial and communal nesting in *Eupemphix nattereri* (Anura, Leiuperidae): interactions with predators and pond structure. *J Nat Hist.* 2006; 40: 2577–2587.
34. Toledo LF, Ribeiro RS, Haddad CF. Anurans as prey: an exploratory analysis and size relationships between predators and their prey. *J Zool.* 2007; 271: 170–177.
35. Melo ACG, Durigan G. Plano de Manejo da Estação Ecológica de Santa Bárbara. São Paulo: Instituto Florestal. 2011.
36. Köppen W. *Climatologia: con un estudio de los climas de la tierra.* 1948.
37. Setzer J. Hydrologic significance of tectonic fractures detectable on airphotos. *Groundwater.* 1966; 4: 23–27.

38. Corn PS. Straight line drift fences and pitfall traps. In: Heyer WR, Donnelly MA, McDiarmid RW, Hayek LAC, Foster MS, editors; Measuring and monitoring biological diversity: standard methods for amphibians. Smithsonian Institution Press, Washington DC, 1994. pp.109–117.
39. Cechin SZ, Martins M. Eficiência de armadilhas de queda (pitfall traps) em amostragens de anfíbios e répteis no Brasil. Rev Bras Zool. 2000; 17: 729–740.
40. Wang Y, Liu Q. Comparison of Akaike information criterion (AIC) and Bayesian information criterion (BIC) in selection of stock-recruitment relationships. Fish Res. 2006; 77: 220–225.
41. R (Core Team). 2018. R: A language and environment for statistical computing. R Foundation for Statistical Computing, Vienna, Austria. Available from: <http://www.R-project.org/>.
42. Pinheiro JC, Bates DM. Linear mixed-effects models: basic concepts and examples. Mixed-effects models in S and S-Plus. 2000; 3–56.
43. Wickham, H. ggplot2: elegant graphics for data analysis. Springer. 2016.
44. Mazerolle MJ, Mazerolle MMJ. 2019. Package ‘AICcmodavg’.
45. Valdujo PH, Silvano DL, Colli GR, Martins M. 2012. Anuran Species Composition and Distribution Patterns in Brazilian Cerrado, a Neotropical Hotspot. S Am J Herpetol. 2012; 7:63–78.
46. Fick SE, Hijmans RJ. WorldClim 2: new 1-km spatial resolution climate surfaces for global land areas. Int J Climatol. 2017; 37: 4302–4315.
47. QGIS Development Team. QGIS Geographic Information System. Open Source Geospatial Foundation Project. <http://qgis.osgeo.org>. 2020.

48. Ribeiro JF, Walter BMT. Fitofisionomias do bioma Cerrado. Embrapa Cerrados-  
Capítulo em livro científico (ALICE). 1998. pp. 166.
49. Thomé MTC. Diversidade de anuros e lagartos em fisionomias de Cerrado na região  
de Itirapina, sudeste do Brasil. Ph.D. Thesis, University of São Paulo. 2006. Available  
from: <https://teses.usp.br/teses/disponiveis/41/41134/tde-29092006-100104/en.php>.
50. de Oliveira Araujo C, de Almeida-Santos SM. Composição, riqueza e abundância de  
anuros em um remanescente de Cerrado e Mata Atlântica no estado de São Paulo. Biota  
Neotrop. 2013; 13: 264–275.
51. Oliveira TALD. Anurofauna em uma área de ecótono entre Cerrado e Floresta  
Estacional: diversidade, distribuição e a influência de características ambientais. M.Sc  
Thesis, Universidade Estadual Paulista. 2012. Available from:  
[https://repositorio.unesp.br/bitstream/handle/11449/87577/oliveira\\_tal\\_me\\_sjrp\\_parcial.  
pdf?sequence=1](https://repositorio.unesp.br/bitstream/handle/11449/87577/oliveira_tal_me_sjrp_parcial.pdf?sequence=1)
52. Duleba S. Herpetofauna de serrapilheira da RPPN Cabeceira do Prata, Mato Grosso  
do Sul, Brasil. M.Sc Thesis, Fundação Universidade Federal de Mato Grosso do Sul.  
2013. Available from:  
[https://repositorio.ufms.br:8443/jspui/bitstream/123456789/2084/1/Samuel%20Duleba.  
pdf](https://repositorio.ufms.br:8443/jspui/bitstream/123456789/2084/1/Samuel%20Duleba.pdf)
53. Ramalho W. Guerra Batista V. Passos Lozi LR. Anfíbios e répteis do médio rio  
Aporé, estados de Mato Grosso do Sul e Goiás, Brasil. Neotrop Bio Conserv. 2014; 9:  
147–160.
54. Motta J. A herpetofauna no cerrado: composição de espécies, sazonalidade e  
similaridade. M.Sc Thesis Universidade Federal de Goiás. 1999. Available from:

472 [https://repositorio.bc.ufg.br/tede/bitstream/tede/9953/5/Dissertação%20-](https://repositorio.bc.ufg.br/tede/bitstream/tede/9953/5/Dissertação%20-%20José%20Augusto%20de%20Oliveira%20Motta%20-%201999.pdf)  
473 [%20José%20Augusto%20de%20Oliveira%20Motta%20-%201999.pdf](https://repositorio.bc.ufg.br/tede/bitstream/tede/9953/5/Dissertação%20-%20José%20Augusto%20de%20Oliveira%20Motta%20-%201999.pdf)

474 55. Tracy CR. A model of the dynamic exchanges of water and energy between a  
475 terrestrial amphibian and its environment. *Ecol Monogr.* 1976; 46:293–326.

476 56. Tracy CR, Christian KA, Tracy CR. Not just small, wet, and cold: effects of body  
477 size and skin resistance on thermoregulation and arboreality of frogs. *Ecology.* 2010;  
478 91: 1477–1484.

479 57. Pianka ER. Ecology and natural history of desert lizards: analyses of the ecological  
480 niche and community structure (Vol. 4887). Princeton University Press. 1986.

481 58. Bastos RP, Motta JDO, Lima LP, Guimarães LD. Anfíbios da floresta nacional de  
482 Silvânia, Estado de Goiás. Stylo gráfica e editora, Goiânia. 2003.

483 59. Uetanabaro M, Souza FL, Landgraf Filho P, Beda AF, Brandão RA. Anfíbios e  
484 répteis do Parque Nacional da Serra da Bodoquena, Mato Grosso do Sul, Brasil. *Biota*  
485 *Neotrop.* 2007; 7: 279–289.

486 60. Anderson RC, Andrade DV. Trading heat and hops for water: Dehydration effects  
487 on locomotor performance, thermal limits, and thermoregulatory behavior of a  
488 terrestrial toad. *Ecol Evol.* 2017; 7: 9066–9075.

489 61. Angilletta MJ, Wilson RS, Navas CA, James RS. Tradeoffs and the evolution of  
490 thermal reaction norms. *Trends Ecol Evol.* 2003; 18: 234–240.

491 62. Navas CA, Gomes FR, Carvalho JE. Thermal relationships and exercise physiology  
492 in anuran amphibians: Integration and evolutionary implications. *Comp Biochem Phys*  
493 *A.* 2008; 151: 344–362.



63. Artacho P, Saravia J, Ferrandière BD, Perret S, Galliard L. Quantification of correlational selection on thermal physiology, thermoregulatory behavior, and energy metabolism in lizards. *Ecol Evol.* 2015; 5: 3600–3609.
64. Watling JI, Braga L. Desiccation resistance explains amphibian distributions in a fragmented tropical forest landscape. *Landsc Ecol.* 2015; 30: 1449–1459.
65. Young JE, Christian KA, Donnellan S, Tracy CR, Parry D. Comparative analysis of cutaneous evaporative water loss in frogs demonstrates correlation with ecological habits. *Physiol. Biochem. Zool.* 2005; 78: 847–856.
66. Beuchat CA, Pough FH, Stewart MM. Response to simultaneous dehydration and thermal stress in three species of Puerto Rican frogs. *J. Comp. Physiol. B.* 1984; 154: 579–585.
67. Tingley R, Shine R. Desiccation risk drives the spatial ecology of an invasive anuran (*Rhinella marina*) in the Australian semi-desert. *Plos One.* 2011; 6: e25979.
68. Brown GP, Kelehear C, Shine R. Effects of seasonal aridity on the ecology and behaviour of invasive cane toads in the Australian wet-dry tropics. *Funct Ecol.* 2011; 25: 1339–1347.
69. Titon JB, Gomes FR. Associations of water balance and thermal sensitivity of toads with macroclimatic characteristics of geographical distribution. *Comp Biochem Phys A.* 2017; 208: 54–60.
70. Rothermel BB, Semlitsch RD. An experimental investigation of landscape resistance of forest versus old-field habitats to emigrating juvenile amphibians. *Conserv Biol.* 2002; 16: 1324–1332.

71. Cosentino BJ, Schooley RL, Phillips CA. Connectivity of agroecosystems: dispersal costs can vary among crops. *J Landsc Ecol.* 2011; 26: 371–379.
72. de Candolle AP. *Essai élémentaire de géographie botanique.* FS Laeraule. 1820.
73. Barnes AD, Spey IK, Rohde L, Brose U, Dell AI. Individual behaviour mediates effects of warming on movement across a fragmented landscape. *Funct Ecol.* 2015; 29: 1543–1552.
74. Williams SE, Shoo LP, Isaac JL, Hoffmann AA, Langham G. Towards an integrated framework for assessing the vulnerability of species to climate change. *Plos Biol.* 2008; 6: e325.
75. Sinclair BJ, Marshall KE, Sewell MA, Levesque DL, Willett CS, Slotsbo S, et al. Can we predict ectotherm responses to climate change using thermal performance curves and body temperatures?. *Ecol Lett.* 2016; 19: 1372-1385.
76. Carey C, Alexander MA. Climate change and amphibian declines: is there a link?. *Divers Distrib.* 2003; 9: 111–121.
77. Butchart SH, Walpole M, Collen B, Van Strien A, Scharlemann JP, Almond RE, et al. Global biodiversity: indicators of recent declines. *Science.* 2010; 328: 1164–1168.
78. Alford RA, Dixon PM, Pechmann JH. Global amphibian population declines. *Nature.* 2001; 412: 499–500.
79. Blaustein AR, Walls SC, Bancroft BA, Lawler JJ, Searle CL, Gervasi SS. Direct and indirect effects of climate change on amphibian populations. *Diversity.* 2010; 2: 281–313.

## Supporting information

**S1 Fig.** Detail of hind feet of (A-B) *P. nattereri* and (C-D) *P. cuvieri*, showing the inner and outer metatarsal tubercles in the detail. Note the much larger and strongly keratinized tubercles in *P. nattereri*. Photos not to scale.

**S2 Fig.** A) Temperature during a 24-hour cycle measured with sensors buried in the soil at superficial soil (green) and below ground level (red) and in a frog-sized plaster model (blue). B) Illustration of the measurement setup.

**S1 Table.** Voluntary Thermal Maximum measurements of both species.

**S2 Table.** Temperature data of *P. cuvieri* during experiments.

**S3 Table.** Temperature data of *P. nattereri* during experiments.

**S4 Table.** Geographical records of both species in the Cerrado ecoregion.

**S5 Table.** Habitat and abundance data for both species in six localities of the Cerrado ecoregion. Sources of data: Thomé (2006); Oliveira (2012); Duleba (2013); Ramalho et al. (2014); Motta (2019).
